1 ***NCOA3* identified as a new candidate to explain autosomal dominant progressive**  
2 **hearing loss**

3  
4 Rodrigo Salazar da Silva<sup>1</sup>, Vitor Lima Goes Dantas<sup>1</sup>, Leandro Ucela Alves<sup>1</sup>, Ana Carla  
5 Batissoco<sup>1,2</sup>, Jeanne Oiticica<sup>2</sup>, Elizabeth A Lawrence<sup>3</sup>, Abdelwahab Kawafi<sup>3</sup>, Yushi  
6 Yang<sup>4,5,6</sup>, Fernanda Stávale Nicastro<sup>7</sup>, Beatriz Caiuby Novaes<sup>7</sup>, Chrissy Hammond<sup>3</sup>,  
7 Erika Kague<sup>1,3\*#</sup> and Regina Célia Mingroni Netto<sup>1\*#</sup>

8  
9 1. Centro de Pesquisas sobre o Genoma Humano e Células-Tronco, Departamento de  
10 Genética e Biologia Evolutiva, Instituto de Biociências, Universidade de São Paulo,  
11 05508-090, São Paulo, Brazil

12 2. Laboratório de Otorrinolaringologia/LIM32 – Hospital das Clínicas, Faculdade de  
13 Medicina, Universidade de São Paulo, 01246-903, São Paulo, Brazil

14 3. School of Pharmacology, Physiology and Neuroscience, University of Bristol,  
15 Bristol, BS8 1TD, United Kingdom.

16  
17 4. School of Physics, University of Bristol, Bristol, BS8 1TL, United Kingdom.

18  
19 5. Centre for Nanoscience and Quantum Information, University of Bristol, Bristol, BS8  
20 1FD, United Kingdom.

21  
22 6. Bristol Centre for Functional Nanomaterials, University of Bristol, Bristol, BS8 1FD,  
23 United Kingdom.

24  
25 7. Divisão de Educação e Reabilitação dos Distúrbios da Comunicação da Pontifícia  
26 Universidade Católica de São Paulo, 04022-040, São Paulo, Brazil

27

28

29 \* Corresponding authors:

30 Regina Célia Mingroni Netto (renetto@ib.usp.br) and Erika Kague  
31 (erika.kague@bristol.ac.uk)

32

33 # joint senior authors

34

35

36

37 **Abstract**

38

39 Hearing loss is a frequent sensory impairment in humans and genetic factors account for  
40 an elevated fraction of the cases. We have investigated a large family of five  
41 generations, with 15 reported individuals presenting non-syndromic, sensorineural,  
42 bilateral and progressive hearing loss, segregating as an autosomal dominant condition.  
43 Linkage analysis, using SNP-array and selected microsatellites, identified a region of  
44 13cM in chromosome 20 as the best candidate to harbour the causative mutation. After  
45 exome sequencing and filtering of variants, only one predicted deleterious variant in the  
46 *NCOA3* gene (NM\_181659, c.2810C>G; p.Ser937Cys) fit in with our linkage data. RT-  
47 PCR, immunostaining and *in situ* hybridization showed expression of *ncoa3* in the inner  
48 ear of mice and zebrafish. We generated a stable homozygous zebrafish mutant line  
49 using the CRISPR/Cas9 system. *ncoa3*<sup>-/-</sup> did not display any major morphological  
50 abnormalities in the ear, however, anterior macular hair cells showed altered orientation.  
51 Surprisingly, chondrocytes forming the ear cartilage showed abnormal behaviour in  
52 *ncoa3*<sup>-/-</sup>, detaching from their location, invading the ear canal and blocking the cristae.  
53 Adult mutants displayed accumulation of denser material wrapping the otoliths of  
54 *ncoa3*<sup>-/-</sup> and increased bone mineral density. Altered zebrafish swimming behaviour  
55 corroborates a potential role of *ncoa3* in hearing loss. In conclusion, we identified a  
56 potential candidate gene to explain hereditary hearing loss, and our functional analyses  
57 suggest subtle and abnormal skeletal behaviour as mechanisms involved in the  
58 pathogenesis of progressive sensory function impairment.

## 59 **Introduction**

60           Hearing loss affects almost 466 million people worldwide and is estimated to  
61 affect more than 900 million people by 2050 (1). Genetic factors play an important role  
62 in the pathogenesis of the disease, with up to 55% of age-related hearing loss attributed  
63 to genetics (2). Approximately 70% of hereditary deafness cases are non-syndromic (3),  
64 of which 20% are autosomal dominant (2). Autosomal dominant non-syndromic hearing  
65 loss (ADNSHL) is typically progressive with late and variable average age of onset,  
66 which depends on the nature of the type of mutation and affected gene.

67           Mapping studies of large families have contributed to the identification of  
68 several genes associated with hearing loss (4). Recently, whole-genome and exome  
69 sequencing, in combination with familial cases, have boosted the identification of causal  
70 genes (4–8). The genetic complexity of the condition is highlighted by the large number  
71 of genes identified as associated to monogenic inheritance of non-syndromic hearing  
72 loss (~130), and those related to ADNSHL (~50) (9). New genes are still to be  
73 identified, however, given the extensive genetic heterogeneity underpinning the origin  
74 of hearing loss, newly identified genes and variants are rarely found, in only one or a  
75 few pedigrees, making their confirmation by reproducibility a challenging task.  
76 Therefore, functional studies are key to validate the genetic findings.

77           Hearing loss associated genes fall into common categories such as maintenance  
78 of ionic homeostasis, formation of hair cell stereocilia and regulation of gene  
79 transcription (10–15). Recently, other pathways have also been suggested to play a role  
80 in disease pathogenesis; such as collagen biogenesis and homeostasis (16–18). Thus, the  
81 identification of novel candidate genes associated with hearing loss could reveal new  
82 molecular players involved in the condition and potential therapeutics.

83           Here, we describe a large Brazilian family in which hearing loss segregates as an  
84 autosomal dominant trait. By linkage analysis and exome sequencing we identified a  
85 rare missense variant in the gene *NCOA3* (NM\_181659:c.2810C>G;p.Ser937Cys) that  
86 segregated in the pedigree with hearing loss. We detected expression of the gene in  
87 mice and zebrafish ears. Using CRISPR/Cas9 genome editing, we generated a zebrafish  
88 *ncoa3*<sup>-/-</sup> which showed cartilage behaviour abnormalities in the larval sensorial region  
89 of the ear, amorphous material accumulation in proximity with adult otoliths, higher  
90 mineral density and abnormal adult swimming behaviour. Our work provides evidence  
91 of *NCOA3* playing an important role in skeletal system homeostasis and suggests  
92 *NCOA3* as a potential candidate gene associated with hearing impairment.

93 **Results**

94 **Clinical findings in patients of a family with autosomal dominant, non-syndromic,**  
95 **sensorineural hearing loss**

96 The five-generation Brazilian family examined in this study presented  
97 individuals affected by nonsyndromic, progressive, sensorineural, bilateral, moderate-  
98 to-profound hearing loss, segregating as an autosomal dominant condition (Figure 1A).  
99 Affected and non-affected individuals were submitted to audiological tests (Figure 1B).  
100 Age of onset of hearing loss varied from 4 to 35 years, with the average age of onset  
101 being 12 years old (Table 1).

102 We performed ear, nose and throat (ENT) physical examinations. Patients III-5,  
103 III-8, III-10, IV-20 and IV-21, showed normal results, as well as normal computed  
104 tomography scan of temporal bones, magnetic resonance imaging of the inner ear and  
105 thyroid ultrasound. IV-20 and IV-21 had bilateral mild earlobe hypogenesis. IV-21  
106 showed coloboma auris. Other minor clinical findings were also observed. IV-5, IV-6:  
107 bifid uvula at oropharynx cavity examination; III-8 and III-10: normal responses from  
108 the otoneurological evaluation, including electrooculography with caloric tests; and III-  
109 5: despite the absence of vestibular complaints, showed right idiopathic vestibular  
110 weakness on caloric test.

111 **Linkage analysis points to a region of 13.5Mb on chromosome 20**

112 LOD score values from SNP-array analysis, assuming both complete ( $K= 1$ ) and  
113 incomplete ( $K= 0.8$  and  $K=0,64$ ) penetrance suggested linkage to chromosome  
114 20(chr20:40201234-53724200, 64 and 88 cM, GRCh37/hg19), with maximum positive  
115 value of 1.806 ( $K= 1$ ; Figure 1D) and 1.805 ( $K= 0.8$  and  $K= 0,64$ ). This region has 13,5  
116 Mb and contains 161 genes. We selected twelve microsatellite markers mapped along  
117 chromosome 20 (Supplementary Figure 1), which confirmed our SNP-array analysis

118 pointing to a candidate region between 58 and 79 cM (complete penetrance,  $K= 1$ ,  
119 maximum Lod score= 1.006) and between 56 and 83 cM (incomplete penetrance,  $K=$   
120 0.8 and  $K= 0,64$ , maximum Lod score=2.286). No other chromosomal region showed  
121 higher Lod scores than the ones obtained in chromosome 20. The maximum two-point  
122 LOD score value for this genealogy was simulated for complete ( $k=1$ ) and incomplete  
123 ( $K= 0.8$  and  $K= 0,64$ ) penetrance resulting in 4.214, 3.580 and 3.145, respectively.

#### 124 **Variant in *NCOA3* identified as candidate for hearing loss by whole-exome** 125 **sequencing**

126 We conducted whole-exome sequencing in samples from two of the affected  
127 individuals (III-8 and III-10) (Figure 1A); obtaining approximately 70M reads per  
128 sample (read average length of 99 bp, average coverage of 120X and 98% of target  
129 bases with more than 20 reads). We selected autosomal, exonic, heterozygous and  
130 nonsynonymous variants with  $Q >30$  and coverage  $> 20$ , checked them against public  
131 variant databases and 66 control samples (sequenced simultaneously), and filtered for  
132 variants with frequencies lower than 0.01. A total of 162 variants shared by both  
133 samples were obtained (Table 2; Supplementary Table 1). From these variants, only the  
134 NM\_181659: c.2810C>G: p.S937C in *NCOA3* gene matched the suggestive positive  
135 LOD score region mapped in the chromosome 20, as indicated by the linkage analysis.

136 Only two variants were detected in genes previously described as associated to  
137 hearing loss: NM\_001258370: c.A1565G:p.Gln522Arg (*DIAPH3*) and NM\_005709:  
138 c.G946C:p.Glu316Gln (*USH1C*). The variants in *DIAPH3* and *USH1C* were  
139 investigated in the pedigree by Sanger sequencing, and their segregation was not  
140 compatible with the segregation of hearing loss in the family (Supplementary Figure 2).  
141 Moreover, copy-number variation was excluded after array-CGH (Agilent  
142 Technologies, 180K).

143 *NCOA3* (Nuclear Receptor Coactivator 3) comprises 23 exons, encoding a  
144 protein of 1420 amino acids, with a suggested function in the regulation of gene  
145 transcription, mediated by nuclear receptors and it has never been reported to be  
146 associated with hearing loss. The variant c.2810C>G in exon 15 is predicted to result in  
147 a p.Ser937Cys amino acid substitution within a highly conserved region among  
148 primates (Figures 1E and F). This variant was predicted to be damaging using several  
149 prediction tools: SIFT showed a damaging score of 0.030, and Polyphen2, a score of  
150 0.905. MutationTaster2 predicted that it is a disease-causing mutation (score of 0.845).  
151 The variant, rs142951578, within *NCOA3* has been reported with low frequency by  
152 GnomAD (0.0003465), NHLBI-ESP (0.000538), 1000 genomes (0.001) and was not  
153 described by ABraOM.

154 We investigated the segregation of NM\_181659: c.2810C>G: p.Ser937Cys in  
155 *NCOA3* by Sanger sequencing in 19 samples. This variant was found to be present in  
156 heterozygosis in all seven affected individuals and in 4 non-affected ones (Figure 1A  
157 and 1C). These four heterozygous non-affected individuals are within the range of onset  
158 of hearing loss observed in the family (4-35 years, Table 1), therefore, it is possible that  
159 manifestation of hearing loss will occur later.

#### 160 ***Ncoa3* is expressed in the developing mouse cochlea and zebrafish ear**

161 *Ncoa3* expression in mice has been reported for ovary, testis, liver, skeletal  
162 muscle and adipose tissue (45–47), and transcriptome studies have suggested its  
163 expression in the ear (48,49), however this has been poorly characterised. To determine  
164 the temporal pattern of *Ncoa3* expression in the inner ear of mice we performed RT-  
165 PCR and immunofluorescence on histological sections for 3 distinctive developmental  
166 stages: P4, P10 and P16. *Ncoa3* expression was detected in the cochlea and the organ of  
167 Corti with *stria vascularis* in all the time-points (Figure 2A and B). In addition to these

168 structures, immunofluorescence showed cytoplasmic localisation of *Ncoa3* in the  
169 Reissner membrane, basilar membrane, spiral limbus and spiral ganglion (Figure 2B).  
170 Zebrafish have only one ortholog of *NCOA3*. Whole mount *in situ* hybridization in  
171 zebrafish showed *ncoa3* expression in the otic vesicle of 3 and 5dpf zebrafish larvae  
172 (Figure 2C). Interestingly, there was continued expression even after the ear system is  
173 completely developed, as detected in the inner ear of juvenile fish (5 and 7wpf, weeks  
174 post fertilization) (Figure 2C). *ncoa3* expression was not detected in neuromasts  
175 (mechanosensory system able to detect small water vibrations). Therefore, our results  
176 suggest a conserved expression pattern of *Ncoa3* in the ear.

177 **Zebrafish *ncoa3*<sup>bi456/bi456</sup> show cartilage cell behaviour abnormality in the otic**  
178 **vesicle.**

179 In order to investigate the potential role of *NCOA3* in the pathogenesis of  
180 hearing impairment, we generated *ncoa3* homozygous zebrafish mutants using  
181 CRISPR/Cas9 genome editing. *ncoa3*<sup>bi456/bi456</sup> (*ncoa3*<sup>-/-</sup>) carry a 5bp deletion  
182 (delTACGA) leading to a premature stop codon at position 518aa (S518\_Y1520del),  
183 reducing the protein size from 1520aa to 517aa. Human and zebrafish sequence  
184 alignment showed conservation of 2 out of 5bp within the deletion site. A deleterious  
185 effect was predicted when simulating the same mutation in the human ortholog.

186 *NCOA3* has been previously associated, through GWAS studies, with  
187 osteoarthritis, bone mass, abnormal cartilage behaviour, and notch signalling pathway  
188 (50–54). To investigate chondrocyte behaviour and sensory cells expressing notch in the  
189 zebrafish ear, we crossed *ncoa3*<sup>bi456/bi456</sup> to a double transgenic line carrying  
190 Tg(*col2:mcherry*; *notch:egfp*). Zebrafish *ncoa3*<sup>bi456/bi456</sup> did not display any major  
191 morphological abnormalities of the ear at 5dpf (Supplementary Figure 3A and B).  
192 Surprisingly, we detected abnormal clusters of cartilage cells (*mcherry* positive) lining



193 the cristae region in 95% of larvae (Figure 3A). 3D image analysis showed tight  
194 association of abnormal cartilage cells with notch positive sensory cells (Figure 3A). To  
195 examine if detachment of cartilage cells from main cartilage elements (exostosis) was  
196 disrupting the hair cells, we measured the lengths of the stereocilia and cupula of the  
197 lateral and anterior cristae at 5dpf and no significant differences were detected  
198 (Supplementary Figure 3C).

199 In addition, phalloidin staining, which labels actin filaments of the stereocilia,  
200 was performed to evaluate stereocilia of other regions of the ear. Interestingly, we  
201 detected disorganised distribution of stereocilia of the macula (4/4 of *ncoa3*<sup>-/-</sup> and 0/3  
202 wt) (Figure 3B). We investigated earlier stages of development (2-3dpf) to understand  
203 when chondrocytes were first misplaced. While at 2dpf no differences were detected, by  
204 3dpf ectopic chondrocytes were observed at the cristae and internal regions of the ear  
205 canal (Supplementary Figure 4). This suggests exostosis of cartilage cells from the ear  
206 cartilage layer towards the cristae regions and internally. We did not detect changes in  
207 the neuromasts throughout the larvae, neither in the lateral line (data not shown). We  
208 also did not observe differences in larval swimming behaviour of *ncoa3*<sup>bi456/bi456</sup> at 5dpf  
209 (data not shown). Our results suggest abnormal cartilage behaviour (exostosis) and  
210 disruption of stereocilia organisation in the macula as a potential progressive and subtle  
211 mechanism underlying hearing loss.

### 212 **Higher bone density and ectopic mineralisation within the ear of adult *ncoa3*** 213 *bi456/bi456*

214 Otoliths consist of a proteinaceous core that is biomineralized by calcium  
215 carbonate; in the adult fish ear, a single otolith is tethered to each of the utricular,  
216 saccular and lagenal sensory maculae allowing sensation of linear accelerations and  
217 sound (55). It has been shown that mutations in *Otogelin* and  $\alpha$ -*Tectorin* impair otolith

218 seeding (56), and mutations in their human orthologs *OTOG* and *TECTA* cause  
219 deafness. Therefore, the shape and density of otoliths are indicative of possible defects  
220 in the hearing system. *ncoa3*<sup>bi456/bi456</sup> survive to adulthood and are fertile. To analyse the  
221 3D structure of the adult ears, we performed micro-computerised tomography ( $\mu$ CT) of  
222 1 year old mutants (n= 8) and wts (n= 25). We observed higher bone mineral density of  
223 craniofacial bones of *ncoa3*<sup>bi456/bi456</sup> and abnormal and disorganised mineralisation of  
224 amorphous material was detected in 75% (6/8) of the ears of *ncoa3*<sup>bi456/bi456</sup>, but was  
225 never observed in wt (Figure 4A). This mineralisation was attached to the lagenal  
226 otoliths, which is clearly observed through cross sections (Figure 4A, arrows). We did  
227 not detect abnormalities in the utricular and saccular otoliths. Moreover, otoliths  
228 showed increased bone mineral density in mutants (Figure 4A and C). Therefore, these  
229 results suggest a role of *ncoa3* in bone and ectopic mineralisation regulation in the ears  
230 that could lead to progressive hearing impairment in adult fish. It has been shown that  
231 vestibular function can be assessed through swimming behaviour analyses (57).  
232 Therefore, to test if the fish displayed any signs of hearing loss we analysed swimming  
233 behaviour by tracking individual fish in 2D in a tank containing a shaded corner, and  
234 calculating the spatial distribution heterogeneity of fish under constant ambient  
235 background noise. Vestibular malfunction has been associated to abnormal exploratory  
236 behaviour in zebrafish (57). We hypothesised that if hearing function is altered in  
237 *ncoa3*<sup>bi456/bi456</sup>, these fish would display a distinct exploratory behaviour, dispersing  
238 from the shaded corner of the tank more often than the wt. While the wt was retained  
239 mostly to the shady corner, interestingly the *ncoa3*<sup>bi456/bi456</sup> showed increased spatial  
240 distribution heterogeneity, detected through the comparison of total trajectory  
241 distribution between both groups (Figure 5). Our results suggest possible hearing

242 malfunctioning in *ncoa3*<sup>bi456/bi456</sup> due to differences in bone densities, and ectopic

243 mineral deposition.

244

## 245 **Discussion**

246           Non-syndromic hearing loss is a condition that affects almost 466 million people  
247 worldwide and is characterized by a broad heterogeneity of causes, among them genetic  
248 factors play an outstanding role (2). Reported genes and variants associated with  
249 monogenic forms of the disease have been identified from independent pedigrees and  
250 the rarity of some variants implies that some candidates are hardly reproducible.  
251 Therefore, functional studies are key to support genetic findings. In this sense, animal  
252 models such as mice and zebrafish are valuable and have proved relevant to the  
253 investigation of molecular mechanisms that underlie hearing loss in humans (56,58–60).  
254 The molecular and cellular mechanisms involved in ear development and homeostasis  
255 are highly conserved through evolution and zebrafish have been used elsewhere to study  
256 ear development and to confirm candidate genes involved in hearing loss (61–65).

257           Here, combining linkage analysis with exome sequencing and functional  
258 analysis we have reported for the first time an association between segregation of a rare  
259 variant in *NCOA3* and hearing loss, suggesting a novel mechanism leading to the  
260 pathogenesis of hearing impairment. *NCOA3* is a nuclear receptor coactivator from the  
261 *NCOA* gene family, positively regulating nuclear receptor-mediated gene transcription  
262 (66). We identified a missense variant in *NCOA3*, c.2810C>G: p.Ser937Cys, of which  
263 computation predictions and frequency are compatible with the hypothesis of this  
264 variant being causative of hearing loss. We have provided further expression data in  
265 mice and zebrafish ears, that point to evolutionary conservation of gene function in the  
266 ear. Moreover, through CRISPR/Cas9 we have generated a *ncoa3* zebrafish knockout to  
267 further investigate the effects of loss of function of *ncoa3* in the ear during development  
268 and ageing.

269 NCOA3 function has been linked to reproductive development and physiology  
270 regulation (67–70), pluripotency regulation (71), neurotransmitter metabolism  
271 regulation (72), adipogenesis promotion (73), long-chain fatty acid metabolism  
272 regulation (47). In mice, although around 10% of the knockout animals for *Ncoa3*  
273 exhibit a unilateral drop of the ear (74), they were not submitted to audiological  
274 evaluation. In a previous transcriptome analysis study of mice tissue, *Ncoa3* expression  
275 has been reported in organ of Corti of E16, P0, P4 and P7 C57BL/6, with more  
276 pronounced expression levels observed in the postnatal phases (48). Transcriptome  
277 analysis of inner and outer hair cells from P25-P30 CBA/J mice cochleae also indicated  
278 expression of *Ncoa3* (49). Our results not only confirmed *Ncoa3* expression in the organ  
279 of Corti of P4 mice, but also complemented the aforementioned studies, showing that  
280 the gene is still active in more advanced ages, near the end of cochlea maturation (P10  
281 and P16). Moreover, we showed evidence of NCOA3 protein expression in the mice  
282 hearing system. Protein expression has been detected in all mice ages studied (P4, P10  
283 and P14), with expression pattern spread along several cochlear structures: basilar  
284 membrane, Reissner membrane, organ of Corti, *stria vascularis*, spiral limbus and spiral  
285 ganglion. Altogether, our results suggest that *Ncoa3* may have an important role in the  
286 development and physiology of mice auditory system.

287 We also detected expression of *ncoa3* in zebrafish during and after the  
288 completion of the inner ear development. In addition to the inner ear, fish have another  
289 component to their mechanosensory system; the lateral line, which is also formed by  
290 hair cells, supporting cells and sensory neurons, forming units called neuromasts which  
291 are key during the startle swim behaviour response (75,76). Although there are genes  
292 that are expressed both in the inner ear and lateral line, such as *atoh1a* (77,78) and *ngn1*  
293 (79) and that larval behaviour is observed when such genes are knocked out, *ncoa3* does

294 not follow this pattern, as we did not detect its expression in the neuromasts or changes  
295 to larval startle swim behaviour response in zebrafish *ncoa3*<sup>bi456/bi456</sup>.

296 Functional analysis carried in zebrafish *ncoa3*<sup>bi456/bi456</sup> showed that *ncoa3* is  
297 dispensable for development of the inner ear, but it is important for the maintenance the  
298 skeletal system. Although we did not detect morphological changes (size and shape of  
299 ear) in larval stages, abnormal cartilage cell behaviour was a predominant phenotype in  
300 larval *ncoa3*<sup>bi456/bi456</sup>. In adults, denser craniofacial bones and otoliths, and ectopic  
301 mineralisation in the ears were detected. Abnormal invading cartilage cells could  
302 potentially contribute to ectopic mineralisation in the vestibular region during ageing.  
303 Recent studies inferred *NCOA3* involvement in maintaining skeletal homeostasis, with  
304 evidence of its function in bone mass (53), behaviour and molecular signature of  
305 chondrocytes (80,81). Thus, sustaining its role in regulation of bone density and  
306 cartilage behaviour, respectively. Changes in bone mineral density have also been  
307 associated with hearing loss. Loss of bone mineral density in the cochlea capsule has  
308 been related to hearing loss in Paget's disease (osteoclast/bone resorption disorder (82)).  
309 Mutations in *SOST* (sclerostosis and van Buchem's disease) cause enhanced bone  
310 formation, higher bone mineral density, and calvaria overgrowth, which frequently  
311 compresses cranial nerves leading to hearing loss (83). Although computed tomography  
312 scans of temporal bones revealed normal bone morphology in affected individuals from  
313 the pedigree, it would be interesting to further investigate overall calvarial bone  
314 thickness and bone mineral density in the family, as such data are currently unavailable.  
315 Moreover, computed tomography is not sensitive enough to detect possible subtle  
316 changes at the cellular level that could be contributing to hearing loss as suggested by  
317 our functional analysis.

318           Altered swimming behaviour was previously detected when mutant larvae for  
319 several hearing loss associated genes were analysed, such as *grhl2b*, *myo7aa*, *cdh23*,  
320 *otofa* and *otofb* (84,85). Mutations in the human orthologs are associated with mild to  
321 severe hearing loss (86–89). The respective zebrafish mutants have severe abnormalities  
322 in the inner ear, otoliths and/or lateral line, and recapitulate abnormalities of those  
323 observed in human patients. However, they differ from subtle and progressive changes  
324 involved in *ncoa3* zebrafish mutants and the family that we described. We did not  
325 observe larval behaviour changes in *ncoa3*<sup>-/-</sup> (data not shown). But we observed adult  
326 behaviour changes that fit with progressive hearing loss. While assessment of hearing  
327 loss through adult swimming behaviour in zebrafish is not well explored yet, it has been  
328 shown that when adult zebrafish are introduced into a centre of a magnetic field they  
329 exhibited altered exploratory behaviour due to vestibular malfunction and independent  
330 of lateral line function (57). Therefore, vestibular function can be assessed by  
331 exploratory behaviour changes. In a new environment under constant background noise,  
332 we would expect that fish carrying hearing disability would display altered behaviour.  
333 Ectopic mineral deposition within the ears of adult mutant zebrafish and increased  
334 density of otoliths and craniofacial bones are potentially correlated with the altered  
335 vestibular function and swimming behaviour found in adult mutants.

336           Although family size does not allow a definite conclusion about the c.2810C>G  
337 variant being causative to hearing loss, our functional results were compatible with the  
338 hypothesis of *NCOA3* playing a role in hearing, suggesting skeletal homeostasis  
339 (cartilage behaviour and bone density) as a strong factor involved in the condition. Our  
340 contribution was to attract further attention to *NCOA3* as possibly involved in hearing,  
341 since many groups are dealing with patient samples revealing hundreds of candidate  
342 variants after exome sequencing, without clues to find the causative one. Further

343 functional studies to evaluate the precise effect of the missense variant p.Ser937Cys in  
344 *NCOA3* function would add value in understanding age-related hearing loss in patients  
345 with autosomal dominant pathogenic variants in *NCOA3*.

346



## 347 **Materials and Methods**

### 348 **Patients**

349 A large Brazilian family comprising 5 generations and 15 reported affected  
350 individuals with hearing loss was ascertained in our genetic counselling unit (Centro de  
351 Pesquisas sobre o Genoma Humano e Células-Tronco - IBUSP) for molecular studies.  
352 The transmission of hearing loss in the pedigree is compatible with autosomal dominant  
353 inheritance (Figure 1A). For molecular studies, DNA samples from 19 individuals were  
354 collected: 7 from affected individuals (III-5, III-8, III-10, IV-6, IV-9, IV-21, IV-22), and  
355 12 from unaffected individuals, including spouses (II-4, III-11, IV-5, IV-12, IV-15, IV-  
356 17, IV-18, IV-19, IV-20, V-3, V-5 e V-6). Written informed consent was obtained from  
357 every participant or the respective guardians. The study was approved by the Ethics  
358 Committee from Instituto de Biociências da Universidade de São Paulo.

### 359 **Audiological evaluation**

360 Pure tone audiometry, both air (frequencies ranging from 250 to 8000Hz) and  
361 bone conduction (frequencies ranging from 500 to 4000Hz) were performed for  
362 identification of hearing threshold levels in seven affected individuals (III-5, III-8, III-  
363 10, IV-6, IV-9, IV-21 and IV-22) and eleven non-affected individuals (III-11, IV-5, IV-  
364 12, IV-15, IV-17, IV-18, IV-19, IV-20, V-3, V-5 and V-6). Most of these exams were  
365 done at DERDIC (Divisão de Educação e Reabilitação dos Distúrbios da Comunicação,  
366 PUCSP), while some were conducted by other institutions prior to this study.

### 367 **SNP-array and microsatellite markers genotyping**

368 Genomic DNAs from seven affected individuals (III-5; III-8 III-10; IV-6; IV-9;  
369 IV-21; IV-22) were submitted to SNP-Array (50K) assays (Affymetrix GeneChip  
370 HumanMapping 50K Array, Affymetrix), using the manufacturer's reagents (XbaI) and  
371 following the GeneChip Mapping 10K 2.0 Assay Manual. Scanning was performed in a

372 Genechip Scanner 3000 and interpreted with Affymetrix Genotyping Console software  
373 (Affymetrix). In addition, twelve polymorphic microsatellite markers mapped to  
374 chromosome 20 (ABI Prism Linkage Mapping Sets v2.5) were genotyped in 16 samples  
375 (II-4, III-5, III-8, III-10, IV-5, IV-6, IV-9, IV-12, IV-16, IV-17, IV-18, IV-19, IV-20,  
376 IV-21, IV-22, V-3).

### 377 **Lod score calculations**

378 Penetrance of hearing loss was estimated according to methods previously  
379 described (19). The most likely value of penetrance was  $K= 0.6364$ . Multipoint  
380 logarithm of odds (LOD) score values were calculated, for each autosome, using Merlin  
381 program (20) under dominant inheritance model, assuming a rare allele (frequency=  
382 0.001). The LOD score calculations were performed considering penetrance of  $K=$   
383 0.6364, but also under the assumption of penetrance  $K= 0.8$  and complete penetrance,  
384  $K= 1$ .

### 385 **Whole-exome sequencing**

386 DNA samples from two affected individuals (III-8 and III-10) were submitted to  
387 whole-exome sequencing. The library was prepared with Nextera rapid capture kit  
388 (Illumina), sequence capture was performed with Illumina Exome enrichment kit (~62  
389 Mb target size) and sequencing was performed using HiSeq 2500. Fastq files were  
390 aligned against reference GRCh37 with Burrows-Wheeler Aligner (BWA) (21),  
391 realignment of indel regions, discovery of variants and recalibration of base qualities  
392 were performed using GATK software (22) for the production of VCF files; the VCF  
393 was annotated by ANNOVAR software (23). Variant frequencies were compared with  
394 public variant databases: 1000 Genomes (24), National Heart, Lung, and Blood Institute  
395 Exome Sequencing Project (NHLBI-ESP) (25), Genome Aggregation Database  
396 (gnomAD) (26) and Online Archive of Brazilian Mutations (ABraOM) (27). Polyphen-

397 2 (28), SIFT (29), Provean (30) and MutationTaster2 (31) were used for *in silico*  
398 damage prediction to the protein. Protein sequence alignment near the best candidate  
399 variant was performed by Clustal Omega alignment program (32).

#### 400 **Sanger sequencing**

401 The DNA regions containing candidate variants filtered after exome sequencing  
402 were amplified by PCR. The products were bi-directionally Sanger sequenced with the  
403 BigDye Terminator v3.1 Cycle Sequencing Kit (ThermoFisher Scientific) in ABI 3730  
404 DNA Analyzer (Applied Biosystems). *NCOA3F*-  
405 5'GGCTGTACTTACATGGTATAAGAAGG3', *NCOA3R*-  
406 5'AGGGGAGGGTGGACACTTAC3', *DIAPH3F* -  
407 5'CAAGGGTTTCTGTGCATACC3', *DIAPH3R* -  
408 5'CACTACTCGTTAGTAAATGGAAGGG3', *USH1CF* -  
409 5'GCTGAGAAGACCACCTGCAT3', *USH1CR*-  
410 5'GAGGAGGAGGAAGTTGGCTG3' were used as primers. Sequences were analysed  
411 using Bioedit (Ibis Biosciences).

#### 412 **Multiple alignment of *NCOA3* and its orthologous**

413 Multiple alignment of *NCOA3* gene and protein with its orthologous was  
414 performed using Clustal Omega provided by European Bioinformatics Institute (EMBL-  
415 EBI) (33). For this purpose, the following sequences were used: *Homo sapiens*  
416 (NM\_181659.2 and NP\_858045.1); *Pan troglodytes* (XM\_016938072.2 and  
417 XP\_016793561.2); *Macaca mulatta* (XM\_015148801.1 and XP\_015004287.1); *Bos*  
418 *Taurus* (XM\_002692493.4 and XP\_002692539.1); *Mus musculus* (NM\_008679.3 and  
419 NP\_032705.2); *Rattus norvegicus* (XM\_006235634.2 and XP\_006235696.2); *Gallus*  
420 *gallus* (XM\_004947056.2 and XP\_004947113.2); *Danio rerio* (XM\_687846.9 and  
421 XP\_692938.5) *Xenopus tropicalis* (XM\_018097860.1 and XP\_017953349.1).

422 **Mice husbandry**

423 CBL57/6 mice were obtained from Centro de Pesquisas sobre o Genoma  
424 Humano e Células-Tronco (IBUSP) experimentation housing facility. The animals were  
425 housed as previously described by Council for International Organizations of Medical  
426 Sciences (CIOMS) (34). All experiments with mice were ethically approved by the  
427 Internal Review Board on Ethics in Animal Research from the Instituto de Biociências  
428 da Universidade de São Paulo (Process Number 16.1.668.41.6).

429 **Cochleae and organ of Corti dissection**

430 Cochleae and organ of Corti with *stria vascularis* were harvested from CBL57/6  
431 decapitated mice at 4, 10, 14 and 16 day-old (P4-P16) postnatal CBL57/6 mice. After  
432 decapitation, the head was bathed in ethanol 70%, followed by longitudinal incision at  
433 the skull's sagittal line and visualization of the temporal bone, allowing the dissection  
434 of the labyrinth. For RNA extraction, the labyrinths were transferred to a Petri dish with  
435 RNAlater® (Sigma Aldrich). Cochlea and organ of Corti with *stria vascularis* were  
436 then surgically harvested with micro tweezers (Dumont #5 e #54, Koch Electron  
437 Microscopy) under trinocular stereomicroscope (Discovery V12, Carl Zeiss). For  
438 immunofluorescence assays, cochleae were isolated from labyrinths kept in phosphate  
439 buffered saline (PBS), using micro tweezers (Dumont #5 e #54, Koch Electron  
440 Microscopy) under trinocular stereomicroscope (Discovery V12).

441 **RT-PCR**

442 Total RNA extraction was performed with a pool of 12 cochleae or 12 organs of  
443 Corti with *stria vascularis* from P4, P10 and P16 mice, as well as with gastrocnemius  
444 sample of P180 mice. Total RNA was extracted with RNeasy Microarray Tissue Mini  
445 Kit (QIAGEN). Synthesis of cDNA was performed with RNeasy Microarray Tissue  
446 Mini Kit (QIAGEN), using 1µg of total RNA. Primers used for this experiment were:

447 *Ncoa3*F-5'CGTTTCTCCTTGGCTGATGG3', *Ncoa3*R-  
448 5'CGGGATTTGGGTTTGGTCTG3', *Actb*F-5'GGCTGTATTCCCCTCCATCG3',  
449 *Actb*R-5'CCAGTTGGTAACAATGCCATGT3', *B2m*F-  
450 5'TCGCGGTCGCTTCAGTCGTC3', *B2m*R- 5'TTCTCCGGTGGGTGGCGTGA3'.

451 Control experiments concomitantly performed were negative control of cDNA synthesis  
452 (using water instead of extracted RNA), negative control of RT-PCR (using water  
453 instead of cDNA), and positive control (using cDNA synthesized from gastrocnemius  
454 RNA). Housekeeping genes used as reference for this experiment were *Actb* and *B2m*.

#### 455 **Immunofluorescence assays**

456 Cochleae preparation and immunofluorescence assays were performed as  
457 described by (35). Cochleae were perfused locally and fixed in 4% paraformaldehyde  
458 (PFA) at 4°C overnight (o/n). P10 and P14 passed through decalcification with 10%  
459 EDTA and 1% PFA at 4°C for 4 days. All tissues were washed with 1X PBS, submitted  
460 to serial dilutions of sucrose solution and Jung Tissue Freezing Medium (Leica  
461 Microsystems), frozen and transversely cryosectioned in 12µm. Slides were stored at -  
462 80°C until use. For immunofluorescence assays, histological slides were simultaneously  
463 permeabilized and blocked with 0.3% triton X-100 and 4% bovine serum albumin  
464 (BSA) solution, followed by incubation in solution containing 1:50 polyclonal anti-  
465 NCOA3 antibody (anti-SCR3 antibody - ChIP Grade, Rabbit Polyclonal, ab2831,  
466 Abcam Inc.) diluted in 0.1% triton X-100 and 4% BSA, at 4°C o/n. Subsequently, the  
467 slides were incubated in solution containing 1:500 anti-rabbit AlexaFluor-568 diluted in  
468 0.1% triton X-100, 1% BSA, at for 2h at room temperature. After rinse in PBS, the  
469 slides were then mounted with Prolong Gold Antifade Reagent (Invitrogen) with DAPI  
470 for nuclei staining. Images were taken confocal microscope either LSM 780 (Carl Zeiss)  
471 or LSM880 (Carl Zeiss), using Zen software (Carl Zeiss).

472 **Zebrafish husbandry and lines**

473 Zebrafish were housed as previously described (36). Animal experiments were  
474 ethically approved by the Animal Welfare and Ethical Review Body (AWERB) at the  
475 University of Bristol and performed under a UK Home Office project and by the  
476 Internal Review Board on Ethics in Animal Research from the Instituto de Biociências  
477 da Universidade de São Paulo (Process Number 16.1.668.41.6). Transgenic lines used  
478 have been previously described: *TgBAC(Col2a1a:mCherry)<sup>hu5910</sup>* (37) and  
479 *Tg(notch:egfp)* (38).

480 **Whole-mount *in situ* hybridization in zebrafish**

481 Whole-mount *in situ* hybridizations on zebrafish samples were performed as  
482 described by (39). *ncoa3 in situ* probe was synthesised *in vitro* from a PCR product(880  
483 bp amplified from exon11) using a T7 RNA Polymerase for transcription  
484 (ThermoFisher Scientific) and DIG-labelling Mix (Roche) followed by purification with  
485 SigmaSpin™ Post-Reaction Clean-Up Columns (Sigma Aldrich). The following  
486 primers were used for the PCR: *ncoa3-F*  
487 (5'GAATACCTTCTCTAGCAGCTCATTG3') and *ncoa3-R*  
488 (5'taatacgaactcactatagggagCTTATTGAGGAGGTAGTGAAGGAGG3').

489 **Generation of zebrafish *ncoa3*<sup>-/-</sup>**

490 *ncoa3* mutants were generated by CRISPR/Cas9 system as previously described  
491 (40). A gRNA was designed to target *ncoa3*:  
492 TGGGGTCTCCGCGGATACGAGGG(PAM) (chr11:18516059-18516081). Once  
493 synthesised, it was incubated with GeneArt Platinum Cas9 nuclease (Invitrogen) prior  
494 to injections into 1 cell stage zebrafish embryos. DNA was extracted from 20 individual  
495 larvae at 2 days post fertilization (dpf), followed by PCR amplification (*ncoa3*CRISPR  
496 F: FAM-ATGAATGAGCAAGGCCACAT; *ncoa3*CRISPR R:

497 GGACTTGCTCCCATTTTAGG) and subjected to fragment length analysis (ABI  
498 3500) to test gRNA efficiency (90% efficiency rate detected). G0s were outcrossed to  
499 generate G1s which were submitted to Sanger sequencing. The mutant line *ncoa3*<sup>bi456</sup>  
500 carries a 5bp deletion, leading to a premature stop codon predicted to undergo mRNA  
501 nonsense mediated decay.

## 502 **Microscopy**

503 Samples were mounted in 1% low melting point (LMP) agarose (Invitrogen)  
504 and imaged with a Leica SP5II confocal microscopy (Leica LAS software) using 10x  
505 PL APO CS (dry), 20x immersion lens (phalloidin) or 40x PL APO CS (oil) lenses  
506 (cristae imaging). LasX (Leica) and Amira 6.0 (FEI) was used for 2D and 3D  
507 rendering, image analysis and picture acquisition.

## 508 **3D perspective measurements of the otic vesicle**

509 Two distinct 3D perspective measurements (sagittal/x axis and coronal/y axis)  
510 were taken of the major axis of the otic vesicle at 5dpf from confocal images using  
511 Amira 6.0. GraphPad (Prism) was used for statistical analysis. t-Tests (non-  
512 parametric, Mann-Whitney U test,  $p < 0.05$ ) were performed ( $n = 7$  for each group).

## 513 **Phalloidin staining**

514 Larvae (5dpf) were fixed in 4% PFA at 4°C o/n, washed in PBS 3 x 5 minutes  
515 and incubated in AlexaFluor 555 conjugated phalloidin (1:20 in PBS) o/n at 4°C  
516 (protocol adapted from (41)). Samples were then washed in PBS 3 x 15 minutes,  
517 mounted laterally in 0.5% LMP agarose and imaged on a confocal microscopy.

## 518 **Micro-computerised tomography ( $\mu$ CT) and bone mineral density calculation**

519 Adult fish (1 year old) were fixed in 4% PFA for 1 week followed by sequential  
520 dehydration to 70% ethanol. Fish heads were scanned using an XT H 225ST  $\mu$ CT  
521 scanner (Nikon) with voxel size of 20 $\mu$ m and 5 $\mu$ m for detailed geometric analysis,

522 using an x-ray source of 130 kV, 53 $\mu$ A and without additional filters. Images were  
523 reconstructed using CT Pro 3D software (Nikon). Amira 6.0 was used for image  
524 analysis and to generate 3D volume and surface renders. Lagena otoliths were  
525 segmented from  $\mu$ CT images (20 $\mu$ m resolution) and bone density was quantified by  
526 sampling a region 20 slices thick at the centre of the otoliths. Greyscale values were  
527 calibrated against phantom blocks with calibrated densities.

### 528 **Adult swimming behaviour analysis**

529 Swimming behaviour was assessed by recording 2D movement (from above) in  
530 a rectangular tank. Individual fish (1 year old, wild type (wt)  $n=7$  and *ncoa3*<sup>-/-</sup>  $n=6$ )  
531 were transferred to a tank (35cm  $\times$  40cm) containing a shaded corner (10cm  $\times$  10cm)  
532 and a total of 8 L of water. The tank was placed in an environment of constant  
533 background noise ( $\sim$ 80dB) and recorded with a digital camera (Basler acA2040-120 $\mu$ m)  
534 at a frame rate of 15 frames/s, for 10 minutes (9000 frames). The 2D positions in  
535 different frames were calculated by a custom Python script (42). Trajectories were  
536 obtained by applying a four-frame best estimate algorithm (43) to the positions, and  
537 further refined following the approach described in (44). For each fish, we calculated its  
538 normalised 2D spatial distribution  $P(N)$  where  $N$  is the number of times the fish stays in  
539 a grid, whose size is 100 pixels by 100 pixels. We then calculated the standard deviation  
540 of  $N$  in all grids as a proxy to the spatial distribution heterogeneity, noted as  $Std(N)$ .  
541 The difference in the behaviours between the wt fish and the mutant fish is then  
542 characterised by  $Std(N)$  values of each individual. Assuming the spatial heterogeneity  
543 of the wt fish and the mutant fish follow the normal distributions with different  
544 variances, we used student t test to calculate the probability of their average values  
545 being the same ( $p < 0.05$  statistically significant).

546



547 **Acknowledgements**

548 EK and CH were funded by Versus Arthritis (19476, 21211). AK was funded by  
549 BBSRC SWBio-DTP studentship and EL by a Wellcome Trust Dynamic Molecular  
550 Cell Biology PhD studentship. This work was supported by Fundação de Amparo à  
551 Pesquisa do Estado de São Paulo (FAPESP - CEPID Human Genome and Stem-Cell  
552 Research Center 2013/08028-1), Coordenação de Aperfeiçoamento de Pessoal de Nível  
553 Superior – CAPES and Conselho Nacional de Desenvolvimento Científico e  
554 Tecnológico (CNPq, grant 133182/2015-0). The authors are indebted to all  
555 professionals of Divisão de Educação e Reabilitação dos Distúrbios da Comunicação  
556 (DERDIC) da Pontifícia Universidade Católica de São Paulo, São Paulo (PUC-SP), in  
557 special to Márcia Zucheratto, for audiological evaluations. We thank Dr. Maria Rita  
558 Passos-Bueno for support on establishing the zebrafish laboratory at Instituto de  
559 Biociências da Universidade da São Paulo (IBUSP) and Dr. Marília O. Scliar for  
560 bioinformatics assistance. We also thank Ms. André S. Bueno for assistance and Drs.  
561 Erika Freitas and Carla Rosenberg for Array-CGH.

562

563 **Author contributions**

564 RSS, VLGD, FSN, BCN, EL, AK, YY and EK performed experiments. RSS, VLGD,  
565 LUA, ACB, JO, EL, AK, YY, RCMN and EK analysed data. The project was designed  
566 by RCMN (gene identification) and EK (functional analysis). All authors contributed to  
567 drafting the manuscript.

568

569 **Conflicts of interest**

570 We declare no competing interests.

571

572

573

574 **References**

575

- 576 1. WHO | World Health Organization. WHO | World Health Organization  
577 <http://www.who.int> (accessed Aug 23, 2018).
- 578 2. Shearer, A. E., Hildebrand, M. S. and Smith, R. J. (1993) Hereditary Hearing Loss  
579 and Deafness Overview. In Adam, M. P., Ardinger, H. H., Pagon, R. A., et al.  
580 (eds.), *GeneReviews*®, University of Washington, Seattle, Seattle (WA).
- 581 3. Keats, B. J. B. and Berlin, C. I. (1999) Genomics and Hearing Impairment. *Genome*  
582 *Res.*, **9**, 7–16.
- 583 4. Vona, B., Nanda, I., Hofrichter, M. A. H., et al. (2015) Non-syndromic hearing loss  
584 gene identification: A brief history and glimpse into the future. *Mol. Cell. Probes*,  
585 **29**, 260–270.
- 586 5. Brownstein, Z., Friedman, L. M., Shahin, H., et al. (2011) Targeted genomic  
587 capture and massively parallel sequencing to identify genes for hereditary hearing  
588 loss in middle eastern families. *Genome Biol.*, **12**, R89.
- 589 6. Diaz-Horta, O., Duman, D., Li, J. F., et al. (2012) Whole-Exome Sequencing  
590 Efficiently Detects Rare Mutations in Autosomal Recessive Nonsyndromic Hearing  
591 Loss. *PLOS ONE*, **7**, e50628.
- 592 7. Wu, C.-C., Lin, Y.-H., Lu, Y.-C., et al. (2013) Application of Massively Parallel  
593 Sequencing to Genetic Diagnosis in Multiplex Families with Idiopathic  
594 Sensorineural Hearing Impairment. *PLOS ONE*, **8**, e57369.
- 595 8. Pandya, A. (2016) Genetic hearing loss: the journey of discovery to destination –  
596 how close are we to therapy? *Mol. Genet. Genomic Med.*, **4**, 583–587.
- 597 9. Welcome to the Hereditary Hearing Loss Homepage | Hereditary Hearing Loss  
598 Homepage. Welcome to the Hereditary Hearing Loss Homepage | Hereditary  
599 Hearing Loss Homepage <https://hereditaryhearingloss.org/> (accessed May 3, 2020).
- 600 10. Zhao, H.-B., Kikuchi, T., Ngezahayo, A., et al. (2006) Gap Junctions and Cochlear  
601 Homeostasis. *J. Membr. Biol.*, **209**, 177.
- 602 11. Lynch, E. D., Lee, M. K., Morrow, J. E., et al. (1997) Nonsyndromic Deafness  
603 DFNA1 Associated with Mutation of a Human Homolog of the Drosophila Gene  
604 diaphanous. *Science*, **278**, 1315–1318.
- 605 12. Belyantseva, I. A., Boger, E. T., Naz, S., et al. (2005) Myosin-XVa is required for  
606 tip localization of whirlin and differential elongation of hair-cell stereocilia. *Nat.*  
607 *Cell Biol.*, **7**, 148–156.
- 608 13. Vahava, O., Morell, R., Lynch, E. D., et al. (1998) Mutation in Transcription Factor  
609 POU4F3 Associated with Inherited Progressive Hearing Loss in Humans. *Science*,  
610 **279**, 1950–1954.
- 611 14. Collin, R. W. J., Kalay, E., Tariq, M., et al. (2008) Mutations of ESRRB Encoding  
612 Estrogen-Related Receptor Beta Cause Autosomal-Recessive Nonsyndromic  
613 Hearing Impairment DFNB35. *Am. J. Hum. Genet.*, **82**, 125–138.
- 614 15. Hilgert, N., Smith, R. J. H. and Van Camp, G. (2009) Forty-six genes causing  
615 nonsyndromic hearing impairment: Which ones should be analyzed in DNA  
616 diagnostics? *Mutat. Res. Mutat. Res.*, **681**, 189–196.
- 617 16. Gariballa, N., Ben-Mahmoud, A., Komara, M., et al. (2017) A novel aberrant splice  
618 site mutation in COL27A1 is responsible for Steel syndrome and extension of the  
619 phenotype to include hearing loss. *Am. J. Med. Genet. A.*, **173**, 1257–1263.

- 620 17. Booth, K. T., Askew, J. W., Talebizadeh, Z., et al. (2019) Splice-altering variant in  
621 COL11A1 as a cause of nonsyndromic hearing loss DFNA37. *Genet. Med. Off. J.*  
622 *Am. Coll. Med. Genet.*, **21**, 948–954.
- 623 18. Nixon, T. R. W., Alexander, P., Richards, A., et al. (2019) Homozygous Type IX  
624 collagen variants (COL9A1, COL9A2, and COL9A3) causing recessive Stickler  
625 syndrome-Expanding the phenotype. *Am. J. Med. Genet. A.*, **179**, 1498–1506.
- 626 19. Rogatko, A., Pereira, C. A. and Frota-Pessoa, O. (1986) A Bayesian method for the  
627 estimation of penetrance: application to mandibulofacial and frontonasal dysostoses.  
628 *Am. J. Med. Genet.*, **24**, 231–246.
- 629 20. Abecasis, G. R., Cherny, S. S., Cookson, W. O., et al. (2002) Merlin—rapid  
630 analysis of dense genetic maps using sparse gene flow trees. *Nat. Genet.*, **30**, 97–  
631 101.
- 632 21. Li, H. and Durbin, R. (2009) Fast and accurate short read alignment with Burrows–  
633 Wheeler transform. *Bioinformatics*, **25**, 1754–1760.
- 634 22. McKenna, A., Hanna, M., Banks, E., et al. (2010) The Genome Analysis Toolkit: A  
635 MapReduce framework for analyzing next-generation DNA sequencing data.  
636 *Genome Res.*, **20**, 1297–1303.
- 637 23. Wang, K., Li, M. and Hakonarson, H. (2010) ANNOVAR: functional annotation of  
638 genetic variants from high-throughput sequencing data. *Nucleic Acids Res.*, **38**,  
639 e164–e164.
- 640 24. 1000 Genomes | A Deep Catalog of Human Genetic Variation. 1000 Genomes | A  
641 Deep Catalog of Human Genetic Variation <https://www.internationalgenome.org/>  
642 (accessed Aug 16, 2019).
- 643 25. Exome Variant Server. Exome Variant Server <https://evs.gs.washington.edu/EVS/>  
644 (accessed Aug 16, 2019).
- 645 26. gnomAD. gnomAD <https://gnomad.broadinstitute.org/> (accessed Aug 16, 2018).
- 646 27. ABraOM: Brazilian genomic variants. ABraOM: Brazilian genomic variants  
647 <http://abraom.ib.usp.br/> (accessed Aug 16, 2018).
- 648 28. Adzhubei, I. A., Schmidt, S., Peshkin, L., et al. (2010) A method and server for  
649 predicting damaging missense mutations. *Nat. Methods*, **7**, 248–249.
- 650 29. Ng, P. C. and Henikoff, S. (2006) Predicting the Effects of Amino Acid  
651 Substitutions on Protein Function. *Annu. Rev. Genomics Hum. Genet.*, **7**, 61–80.
- 652 30. Choi, Y., Sims, G. E., Murphy, S., et al. (2012) Predicting the Functional Effect of  
653 Amino Acid Substitutions and Indels. *PLOS ONE*, **7**, e46688.
- 654 31. Schwarz, J. M., Cooper, D. N., Schuelke, M., et al. (2014) MutationTaster2:  
655 mutation prediction for the deep-sequencing age. *Nat. Methods*, **11**, 361–362.
- 656 32. Clustal Omega < Multiple Sequence Alignment < EMBL-EBI. Clustal Omega <  
657 Multiple Sequence Alignment < EMBL-EBI  
658 <https://www.ebi.ac.uk/Tools/msa/clustalo/> (accessed Aug 16, 2019).
- 659 33. Madeira, F., Park, Y. M., Lee, J., et al. (2019) The EMBL-EBI search and sequence  
660 analysis tools APIs in 2019. *Nucleic Acids Res.*, **47**, W636–W641.
- 661 34. Research, N. R. C. (US) I. for L. A. (2004) International Guiding Principles for  
662 Biomedical Research Involving Animals (1985). *International Guiding Principles*  
663 *for Biomedical Research Involving Animals (1985)*; National Academies Press  
664 (US), (2004) .
- 665 35. Smeti, I., Watabe, I., Savary, E., et al. (2014) HMGA2, the Architectural  
666 Transcription Factor High Mobility Group, Is Expressed in the Developing and  
667 Mature Mouse Cochlea. *PLOS ONE*, **9**, e88757.
- 668 36. Aleström, P., D’Angelo, L., Midtlyng, P. J., et al. (2019) Zebrafish: Housing and  
669 husbandry recommendations. *Lab. Anim.*, 0023677219869037.

- 670 37. Hammond, C. L. and Schulte-Merker, S. (2009) Two populations of endochondral  
671 osteoblasts with differential sensitivity to Hedgehog signalling. *Dev. Camb. Engl.*,  
672 **136**, 3991–4000.
- 673 38. Parsons, M. J., Pisharath, H., Yusuff, S., et al. (2009) Notch-responsive cells initiate  
674 the secondary transition in larval zebrafish pancreas. *Mech. Dev.*, **126**, 898–912.
- 675 39. Thisse, C. and Thisse, B. (2008) High-resolution *in situ* hybridization to whole-  
676 mount zebrafish embryos. *Nat. Protoc.*, **3**, 59–69.
- 677 40. Brunt, L. H., Begg, K., Kague, E., et al. (2017) Wnt signalling controls the response  
678 to mechanical loading during zebrafish joint development. *Development*, **144**,  
679 2798–2809.
- 680 41. Goody, M. F., Kelly, M. W., Reynolds, C. J., et al. (2012) NAD<sup>+</sup> Biosynthesis  
681 Ameliorates a Zebrafish Model of Muscular Dystrophy. *PLoS Biol.*, **10**.
- 682 42. Yushi Yang (2020) yangyushi/FishPy: First release to get a DOI. *yangyushi/FishPy:*  
683 *First release to get a DOI*; Zenodo, (2020) .
- 684 43. Ouellette, N. T., Xu, H. and Bodenschatz, E. (2006) A quantitative study of three-  
685 dimensional Lagrangian particle tracking algorithms. *Exp. Fluids*, **40**, 301–313.
- 686 44. Xu, H. (2008) Tracking Lagrangian trajectories in position–velocity space. *Meas.*  
687 *Sci. Technol.*, **19**, 075105.
- 688 45. Xu, J., Liao, L., Ning, G., et al. (2000) The steroid receptor coactivator SRC-3  
689 (p/CIP/RAC3/AIB1/ACTR/TRAM-1) is required for normal growth, puberty,  
690 female reproductive function, and mammary gland development. *Proc. Natl. Acad.*  
691 *Sci. U. S. A.*, **97**, 6379–6384.
- 692 46. Louet, J.-F., Coste, A., Amazit, L., et al. (2006) Oncogenic steroid receptor  
693 coactivator-3 is a key regulator of the white adipogenic program. *Proc. Natl. Acad.*  
694 *Sci. U. S. A.*, **103**, 17868–17873.
- 695 47. York, B., Reineke, E. L., Sagen, J. V., et al. (2012) Ablation of Steroid Receptor  
696 Coactivator-3 Resembles the Human CACT Metabolic Myopathy. *Cell Metab.*, **15**,  
697 752–763.
- 698 48. Scheffer, D. I., Shen, J., Corey, D. P., et al. (2015) Gene Expression by Mouse Inner  
699 Ear Hair Cells during Development. *J. Neurosci.*, **35**, 6366–6380.
- 700 49. Liu, H., Pecka, J. L., Zhang, Q., et al. (2014) Characterization of Transcriptomes of  
701 Cochlear Inner and Outer Hair Cells. *J. Neurosci.*, **34**, 11085–11095.
- 702 50. Zhang, B., Li, Z., Wang, W., et al. (2018) NCOA3 Loss Disrupts Molecular  
703 Signature of Chondrocytes and Promotes Posttraumatic Osteoarthritis Progression.  
704 *Cell. Physiol. Biochem. Int. J. Exp. Cell. Physiol. Biochem. Pharmacol.*, **49**, 2396–  
705 2413.
- 706 51. Gee, F., Rushton, M. D., Loughlin, J., et al. (2015) Correlation of the osteoarthritis  
707 susceptibility variants that map to chromosome 20q13 with an expression  
708 quantitative trait locus operating on NCOA3 and with functional variation at the  
709 polymorphism rs116855380. *Arthritis Rheumatol. Hoboken NJ*, **67**, 2923–2932.
- 710 52. Evangelou, E., Kerkhof, H. J., Styrkarsdottir, U., et al. (2014) A meta-analysis of  
711 genome-wide association studies identifies novel variants associated with  
712 osteoarthritis of the hip. *Ann. Rheum. Dis.*, **73**, 2130–2136.
- 713 53. Sheu, Y.-T., Zmuda, J. M., Cauley, J. A., et al. (2006) Nuclear Receptor  
714 Coactivator-3 Alleles Are Associated with Serum Bioavailable Testosterone,  
715 Insulin-Like Growth Factor-1, and Vertebral Bone Mass in Men. *J. Clin.*  
716 *Endocrinol. Metab.*, **91**, 307–312.
- 717 54. Ao, X., Nie, P., Wu, B., et al. (2016) Decreased expression of microRNA-17 and  
718 microRNA-20b promotes breast cancer resistance to taxol therapy by upregulation  
719 of NCOA3. *Cell Death Dis.*, **7**, e2463–e2463.

- 720 55. Lundberg, Y. W., Xu, Y., Thiessen, K. D., et al. (2015) Mechanisms of otoconia  
721 and otolith development. *Dev. Dyn.*, **244**, 239–253.
- 722 56. Stooke-Vaughan, G. A., Obholzer, N. D., Baxendale, S., et al. (2015) Otolith  
723 tethering in the zebrafish otic vesicle requires Otogelin and  $\alpha$ -Tectorin.  
724 *Development*, **142**, 1137–1145.
- 725 57. Ward, B. K., Tan, G. X.-J., Roberts, D. C., et al. (2014) Strong Static Magnetic  
726 Fields Elicit Swimming Behaviors Consistent with Direct Vestibular Stimulation in  
727 Adult Zebrafish. *PLOS ONE*, **9**, e92109.
- 728 58. Diaz-Horta, O., Abad, C., Sennaroglu, L., et al. (2016) ROR1 is essential for proper  
729 innervation of auditory hair cells and hearing in humans and mice. *Proc. Natl. Acad.  
730 Sci.*, **113**, 5993–5998.
- 731 59. Chen, M., Wang, Q., Zhu, G.-H., et al. (2016) Progressive hearing loss and  
732 degeneration of hair cell stereocilia in taperin gene knockout mice. *Biochem.  
733 Biophys. Res. Commun.*, **479**, 703–707.
- 734 60. Kwon, H.-J. (2016) Vitamin D receptor deficiency impairs inner ear development in  
735 zebrafish. *Biochem. Biophys. Res. Commun.*, **478**, 994–998.
- 736 61. Borck, G., Rehman, A. U., Lee, K., et al. (2011) Loss-of-Function Mutations of  
737 ILDR1 Cause Autosomal-Recessive Hearing Impairment DFNB42. *Am. J. Hum.  
738 Genet.*, **88**, 127–137.
- 739 62. Heeringa, S. F., Chernin, G., Chaki, M., et al. (2011) *COQ6* mutations in human  
740 patients produce nephrotic syndrome with sensorineural deafness. *J. Clin. Invest.*,  
741 **121**, 2013–2024.
- 742 63. von Ameln, S., Wang, G., Boulouiz, R., et al. (2012) A Mutation in PNPT1,  
743 Encoding Mitochondrial-RNA-Import Protein PNPase, Causes Hereditary Hearing  
744 Loss. *Am. J. Hum. Genet.*, **91**, 919–927.
- 745 64. Azaiez, H., Decker, A. R., Booth, K. T., et al. (2015) HOMER2, a Stereociliary  
746 Scaffolding Protein, Is Essential for Normal Hearing in Humans and Mice. *PLOS  
747 Genet.*, **11**, e1005137.
- 748 65. Li, J., Zhao, X., Xin, Q., et al. (2015) Whole-Exome Sequencing Identifies a  
749 Variant in TMEM132E Causing Autosomal-Recessive Nonsyndromic Hearing Loss  
750 DFNB99. *Hum. Mutat.*, **36**, 98–105.
- 751 66. Dasgupta, S., Lonard, D. M. and O'Malley, B. W. (2014) Nuclear Receptor  
752 Coactivators: Master Regulators of Human Health and Disease. *Annu. Rev. Med.*,  
753 **65**, 279–292.
- 754 67. Yuan Yuhui, Liao Lan, Tulis David A., et al. (2002) Steroid Receptor Coactivator-3  
755 Is Required for Inhibition of Neointima Formation by Estrogen. *Circulation*, **105**,  
756 2653–2659.
- 757 68. Xu, J., Shao, Z., Glass, K., et al. (2012) Combinatorial Assembly of Developmental  
758 Stage-Specific Enhancers Controls Gene Expression Programs during Human  
759 Erythropoiesis. *Dev. Cell*, **23**, 796–811.
- 760 69. Han, S. J., DeMayo, F. J., Xu, J., et al. (2006) Steroid Receptor Coactivator (SRC)-1  
761 and SRC-3 Differentially Modulate Tissue-Specific Activation Functions of the  
762 Progesterone Receptor. *Mol. Endocrinol.*, **20**, 45–55.
- 763 70. Wang, Z., Shah, O. J. and Hunter, T. (2012) The Transcriptional Coactivators p/CIP  
764 and SRC-1 Control Insulin Resistance through IRS1 in Obesity Models. *PLOS  
765 ONE*, **7**, e36961.
- 766 71. Wu, Z., Yang, M., Liu, H., et al. (2012) Role of Nuclear Receptor Coactivator 3  
767 (Ncoa3) in Pluripotency Maintenance. *J. Biol. Chem.*, **287**, 38295–38304.

- 768 72. York, B., Sagen, J. V., Tsimelzon, A., et al. (2013) Research Resource: Tissue- and  
769 Pathway-Specific Metabolomic Profiles of the Steroid Receptor Coactivator (SRC)  
770 Family. *Mol. Endocrinol.*, **27**, 366–380.
- 771 73. Coste, A., Louet, J.-F., Lagouge, M., et al. (2008) The genetic ablation of SRC-3  
772 protects against obesity and improves insulin sensitivity by reducing the acetylation  
773 of PGC-1 $\alpha$ . *Proc. Natl. Acad. Sci.*, **105**, 17187–17192.
- 774 74. Wang, Z., Rose, D. W., Hermanson, O., et al. (2000) Regulation of somatic growth  
775 by the p160 coactivator p/CIP. *Proc. Natl. Acad. Sci.*, **97**, 13549–13554.
- 776 75. Nicolson, T. (2005) The Genetics of Hearing and Balance in Zebrafish. *Annu. Rev.*  
777 *Genet.*, **39**, 9–22.
- 778 76. Romero-Carvajal, A., Navajas Acedo, J., Jiang, L., et al. (2015) Regeneration of  
779 Sensory Hair Cells Requires Localized Interactions between the Notch and Wnt  
780 Pathways. *Dev. Cell*, **34**, 267–282.
- 781 77. Haddon, C., Jiang, Y. J., Smithers, L., et al. (1998) Delta-Notch signalling and the  
782 patterning of sensory cell differentiation in the zebrafish ear: evidence from the  
783 mind bomb mutant. *Development*, **125**, 4637–4644.
- 784 78. Itoh, M. and Chitnis, A. B. (2001) Expression of proneural and neurogenic genes in  
785 the zebrafish lateral line primordium correlates with selection of hair cell fate in  
786 neuromasts. *Mech. Dev.*, **102**, 263–266.
- 787 79. Andermann, P., Ungos, J. and Raible, D. W. (2002) Neurogenin1 Defines Zebrafish  
788 Cranial Sensory Ganglia Precursors. *Dev. Biol.*, **251**, 45–58.
- 789 80. Zhang, B., Li, Z., Wang, W., et al. (2018) NCOA3 Loss Disrupts Molecular  
790 Signature of Chondrocytes and Promotes Posttraumatic Osteoarthritis Progression.  
791 *Cell. Physiol. Biochem.*, **49**, 2396–2413.
- 792 81. Aşık, M. D., Gürsoy, S., Akkaya, M., et al. (2019) Microarray analysis of cartilage:  
793 comparison between damaged and non-weight-bearing healthy cartilage. *Connect.*  
794 *Tissue Res.*, **0**, 1–9.
- 795 82. Monsell, E. M. (2004) The Mechanism of Hearing Loss in Paget’s Disease of Bone.  
796 *The Laryngoscope*, **114**, 598–606.
- 797 83. Gregson, C. L., Hardcastle, S. A., Cooper, C., et al. (2013) Friend or foe: high bone  
798 mineral density on routine bone density scanning, a review of causes and  
799 management. *Rheumatol. Oxf. Engl.*, **52**, 968–985.
- 800 84. Han, Y., Mu, Y., Li, X., et al. (2011) Grhl2 deficiency impairs otic development and  
801 hearing ability in a zebrafish model of the progressive dominant hearing loss  
802 DFNA28. *Hum. Mol. Genet.*, **20**, 3213–3226.
- 803 85. Vona, B., Doll, J., Hofrichter, M. A. H., et al. (2020) Small fish, big prospects:  
804 using zebrafish to unravel the mechanisms of hereditary hearing loss. *Hear. Res.*,  
805 107906.
- 806 86. Iwasa, Y., Nishio, S., Yoshimura, H., et al. (2013) OTOF mutation screening in  
807 Japanese severe to profound recessive hearing loss patients. *BMC Med. Genet.*, **14**,  
808 95.
- 809 87. Wagatsuma, M., Kitoh, R., Suzuki, H., et al. (2007) Distribution and frequencies of  
810 CDH23 mutations in Japanese patients with non-syndromic hearing loss. *Clin.*  
811 *Genet.*, **72**, 339–344.
- 812 88. Ahmed, Z. M., Riazuddin, S., Riazuddin, S., et al. (2003) The molecular genetics of  
813 Usher syndrome. *Clin. Genet.*, **63**, 431–444.
- 814 89. Vona, B., Nanda, I., Neuner, C., et al. (2013) Confirmation of GRHL2 as the gene  
815 for the DFNA28 locus. *Am. J. Med. Genet. A.*, **161**, 2060–2065.
- 816

817 **Figure Titles and Legends**

818

819 **Figure 1. A rare variant in *NCOA3*, a gene which codes a nuclear receptor**  
820 **coactivator, segregates with hearing loss in the family.** A) Pedigree showing the  
821 segregation of the *NCOA3* variant (NM\_181659: c.2810C>G: p.Ser937Cys). B) 14  
822 audiometric profiles (divided in right and left ear) of 7 patients affected with  
823 sensorineural and bilateral hearing loss. Hearing thresholds until 20dB are considered  
824 normal. C) Chromatograms showing partial sequence from affected patient compared to  
825 a wild-type sequence. Arrow indicates position of the *NCOA3* variant, while scale bar  
826 below indicates which amino acid is changed when the variant is present. D) Multipoint  
827 LOD scores calculated with Merlin software for chromosome 20, using data from SNP  
828 arrays, under assumption of complete penetrance  $K=1$ . E) Schematics of *NCOA3* gene  
829 and its respective protein. bHLH= basic helix-loop-helix domain; PAS= Per/ARNT/Sim  
830 homologous domain; S/T= serine/threonine-rich region; RID= receptor interaction  
831 domain containing multiple LXXLL motifs; AD1 and AD2= activation domains 1 and  
832 2. F) Multiple alignment of *NCOA3* gene and its orthologous (left), as well as multiple  
833 alignment of the respective proteins (right). Arrow indicates position of *NCOA3* variant  
834 (NM\_181659: c.2810C>G: p.Ser937Cys).

835 **Figure 2. *Ncoa3* is expressed in mice ear at P4, P10 and P16.** A) RT-PCR shows  
836 expression of *Ncoa3* and housekeeping genes *Actb* and *B2m* for the different stages of  
837 mice cochlea development and Organ of Corti. M= 100bp molecular weight. Note that  
838 *Ncoa3* is expressed in all stages analysed and in both tissue samples. B)  
839 Immunofluorescence on transversal histological sections of mice cochlea. In the bottom  
840 right corner, a greater zoom of P14 mice cochlea is displayed, showing expression  
841 pattern of *NCOA3*. Anti-NCOA3 (red) has been used, with nuclei shown in blue  
842 (DAPI). BM= Basilar Membrane, OC= Organ of Corti, RM= Reissner Membrane, SG=

843 Spiral Ganglion, SL= Spiral Limbus, SV= Stria Vascularis, TM= Tectorial Membrane.  
844 C) Expression of endogenous *ncoa3* in zebrafish inner ears at larval stages: 3 dpf and  
845 5dpf (days post-fertilization); and juvenile stages: 5wpf and 7wpf (weeks-post-  
846 fertilization). Scale bars= 200 $\mu$ m for 3 and 5 dpf, and 500 $\mu$ m for 5 and 7wpf.

847 **Figure 3. Abnormal cartilage behaviour and macula hair distribution in ears of**  
848 *ncoa3*<sup>-/-</sup> A) 3D renders from confocal images of wt and *ncoa3*<sup>-/-</sup> carrying  
849 Tg(*col2:mcherry*, *notch:gfp*) to show cartilage and cristae, respectively. Arrows indicate  
850 abnormal cartilage cell behaviour (cell exostosis). (ac= anterior crista, lc= lateral crista,  
851 pc= posterior crista). Scale bars= 50 $\mu$ m. Regions of anterior crista and macula were  
852 zoomed in. Scale bars= 20 $\mu$ m. B) Phalloidin staining and confocal imaging to show the  
853 distribution of hair cells. Yellow dashed box to show zoomed in region. Abnormal  
854 distribution of hair cells was observed in the macula (dashed cyan arrows). Scale bars=  
855 50 $\mu$ m, zoomed in region = 20 $\mu$ m.

856 **Figure 4. Abnormal mineralisation of amorphous material within the adult inner**  
857 **ears and higher BMD in *ncoa3*<sup>-/-</sup>.** A) 3D renders from  $\mu$ CT images of wt and *ncoa3*<sup>-/-</sup>  
858 of same age (1 year old). The head was color-coded to show bone mineral density  
859 (g.cm<sup>3</sup>HA; min= 0.338; max= 1.124). Note that craniofacial bones in *ncoa3* mutants  
860 have higher density compared to wt. Otoliths (otl= arrows) were zoomed in. Abnormal  
861 mineralisation (dashed arrows) is observed attached to the otoliths. A cross section  
862 picture was taken to show the mineralised amorphous material (arrows) juxtaposed to  
863 the otoliths. B) Volume of otoliths. C) Bone mineral density of central region of  
864 otoliths. Non-parametric, two-tailed, independent Student's t-Test was used as  
865 statistical analysis (p<0.05). Scale bars= 500 $\mu$ m.

866 **Figure 5. Altered swimming behaviour of adult *ncoa3*<sup>-/-</sup> suggests hearing**  
867 **malfunction.** A) Overlapped Trajectories of 1-year old wt (n= 7) and *ncoa3*<sup>-/-</sup> (n= 6).



868 The bottom right corner is shaded, where the fish are more likely to stay. B) Average  
869 spatial distribution of wt and *ncoa3*<sup>-/-</sup>. A brighter colour indicates that the fish are more  
870 likely to stay in the respective region. For every trajectory acquired from different fish,  
871 the corresponding spatial distribution P(N) was calculated. From every P(N), the  
872 standard deviation of N in all the grids is calculated, noted as Std(N). C) Graph of  
873 Std(N) values for wt and *ncoa3*<sup>-/-</sup>. Error bars represent the standard deviation of Std(N).  
874 Non-parametric, two tailed, t-Test was used (p =0.06).  
875

876 **Tables**

877 Table 1 - Reported ages of onset for hearing loss and ages at the time of clinical  
878 examination.

879  
880

| <b>Patient ID</b> | <b>Classification</b> | <b>Severity of hearing loss</b>                  | <b>Age at examination (years)</b> | <b>Age of onset (years)</b> |
|-------------------|-----------------------|--------------------------------------------------|-----------------------------------|-----------------------------|
| III-5             | Affected              | Moderate in right ear and severe in the left ear | 48                                | 8                           |
| III-8             | Affected              | Profound                                         | 40                                | 35                          |
| III-10            | Affected              | Moderate                                         | 45                                | 20                          |
| IV-6              | Affected              | Mild                                             | 24                                | 7                           |
| IV-9              | Affected              | Mild to severe                                   | 22                                | 6                           |
| IV-21             | Affected              | Moderate in right ear and mild in left ear       | 8                                 | 6                           |
| IV-22             | Affected              | Mild                                             | 4                                 | 4                           |
| II-4              | Not affected          | -                                                | -                                 | -                           |
| IV-5              | Not affected          | Threshold of 35dB only at 6K                     | 27                                | -                           |
| IV-12             | Not affected          | Threshold of 30dB only at 6K                     | 26                                | -                           |
| IV-15             | Not affected          | -                                                | 20                                | -                           |
| IV-17             | Not affected          | -                                                | 15                                | -                           |
| IV-18             | Not affected          | Threshold of 28dB only at 6K                     | 11                                | -                           |
| IV-19             | Not affected          | -                                                | 8                                 | -                           |
| IV-20             | Not affected          | -                                                | 11                                | -                           |
| V-3               | Not affected          | -                                                | 3                                 | -                           |
| V-5               | Not affected          | -                                                | 5                                 | -                           |
| V-6               | Not affected          | -                                                | 4                                 | -                           |

881

882

883 Table 2 – Steps of variant filtering after exome sequencing of samples from two  
884 affected individuals. \*= 66 control samples that were sequenced in the same batch. \*\*=  
885 1000 genomes, NHLBI Exome Sequencing Project, Online Archive of Brazilian  
886 Mutations databases.  
887

| <b>Filtration steps of exonic variants</b>                 | <b># of remaining variants</b> |
|------------------------------------------------------------|--------------------------------|
| Heterozygous variants found in both patients analysed      | 9197                           |
| Exclusion of low-quality variants                          | 9193                           |
| Exclusion of variants with f>1% in control-samples*        | 553                            |
| Exclusion of variants with f>1% in databases**             | 350                            |
| Considering only variants in autosomes                     | 349                            |
| Exclusion of variants in hypervariable genes               | 302                            |
| Exclusion of synonymous variants                           | 162                            |
| Considering only variants in chromosome 20                 | 3                              |
| Considering only variants in the positive Lod score region | 1                              |

888

889

890 **Abbreviations**

891 Animal Welfare and Ethical Review Body: AWERB

892 Autosomal dominant non-syndromic hearing loss: ADNSHL

893 Bovine serum albumin: BSA

894 Council for International Organizations of Medical Sciences: CIOMS

895 Clustered regularly interspaced short palindromic repeats: CRISPR

896 CRISPR associated protein 9: Cas9

897 Days post fertilization: dpf

898 Ear, nose and throat: ENT

899 European Bioinformatics Institute: EMBL-EBI

900 Genome Aggregation Database: gnomAD

901 Multipoint logarithm of odds: LOD

902 National Heart, Lung, and Blood Institute Exome Sequencing Project: NHLBI-ESP

903 Online Archive of Brazilian Mutations: ABraOM

904 Paraformaldehyde: PFA

905 Postnatal Day: P

906 Wpf: weeks post fertilization

907

**Figure 1**  
 bioRxiv preprint doi: <https://doi.org/10.1101/2020.06.07.138909>; this version posted June 8, 2020. The copyright holder for this preprint (which was not certified by peer review) is the author/funder. All rights reserved. No reuse allowed without permission.

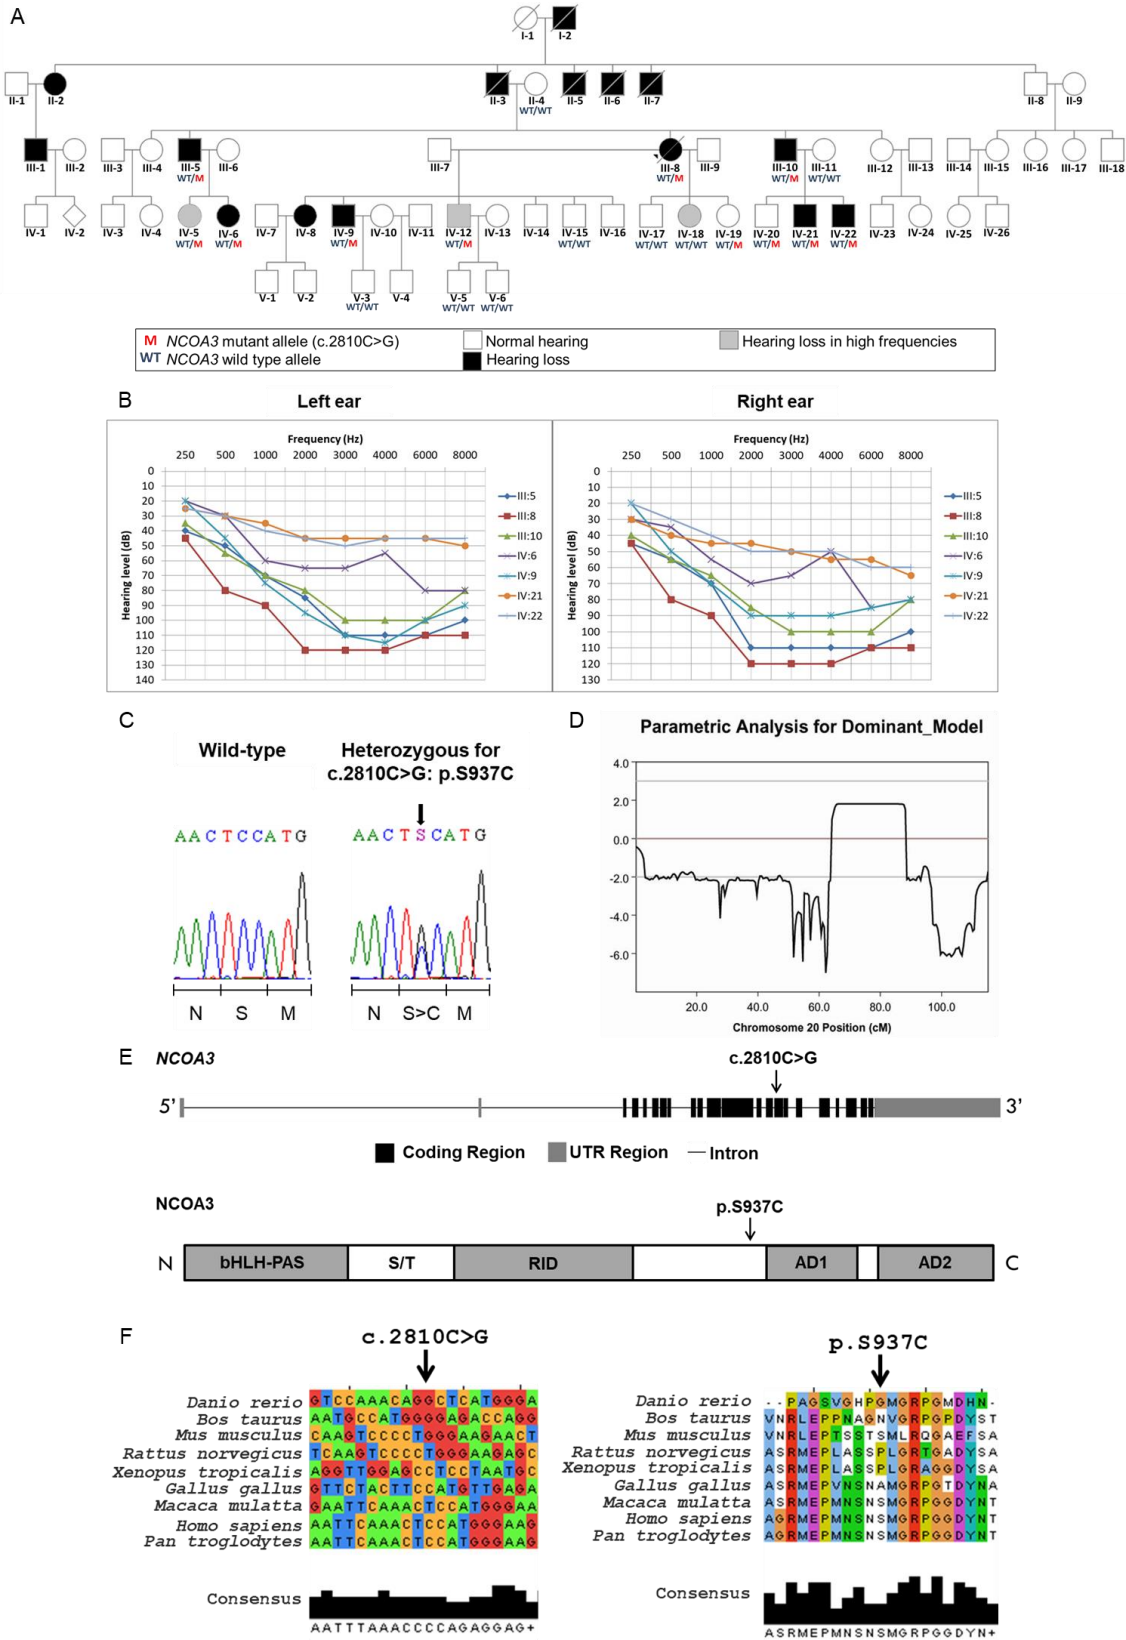

Figure 2

bioRxiv preprint doi: <https://doi.org/10.1101/2020.06.07.138909>; this version posted June 8, 2020. The copyright holder for this preprint (which was not certified by peer review) is the author/funder. All rights reserved. No reuse allowed without permission.

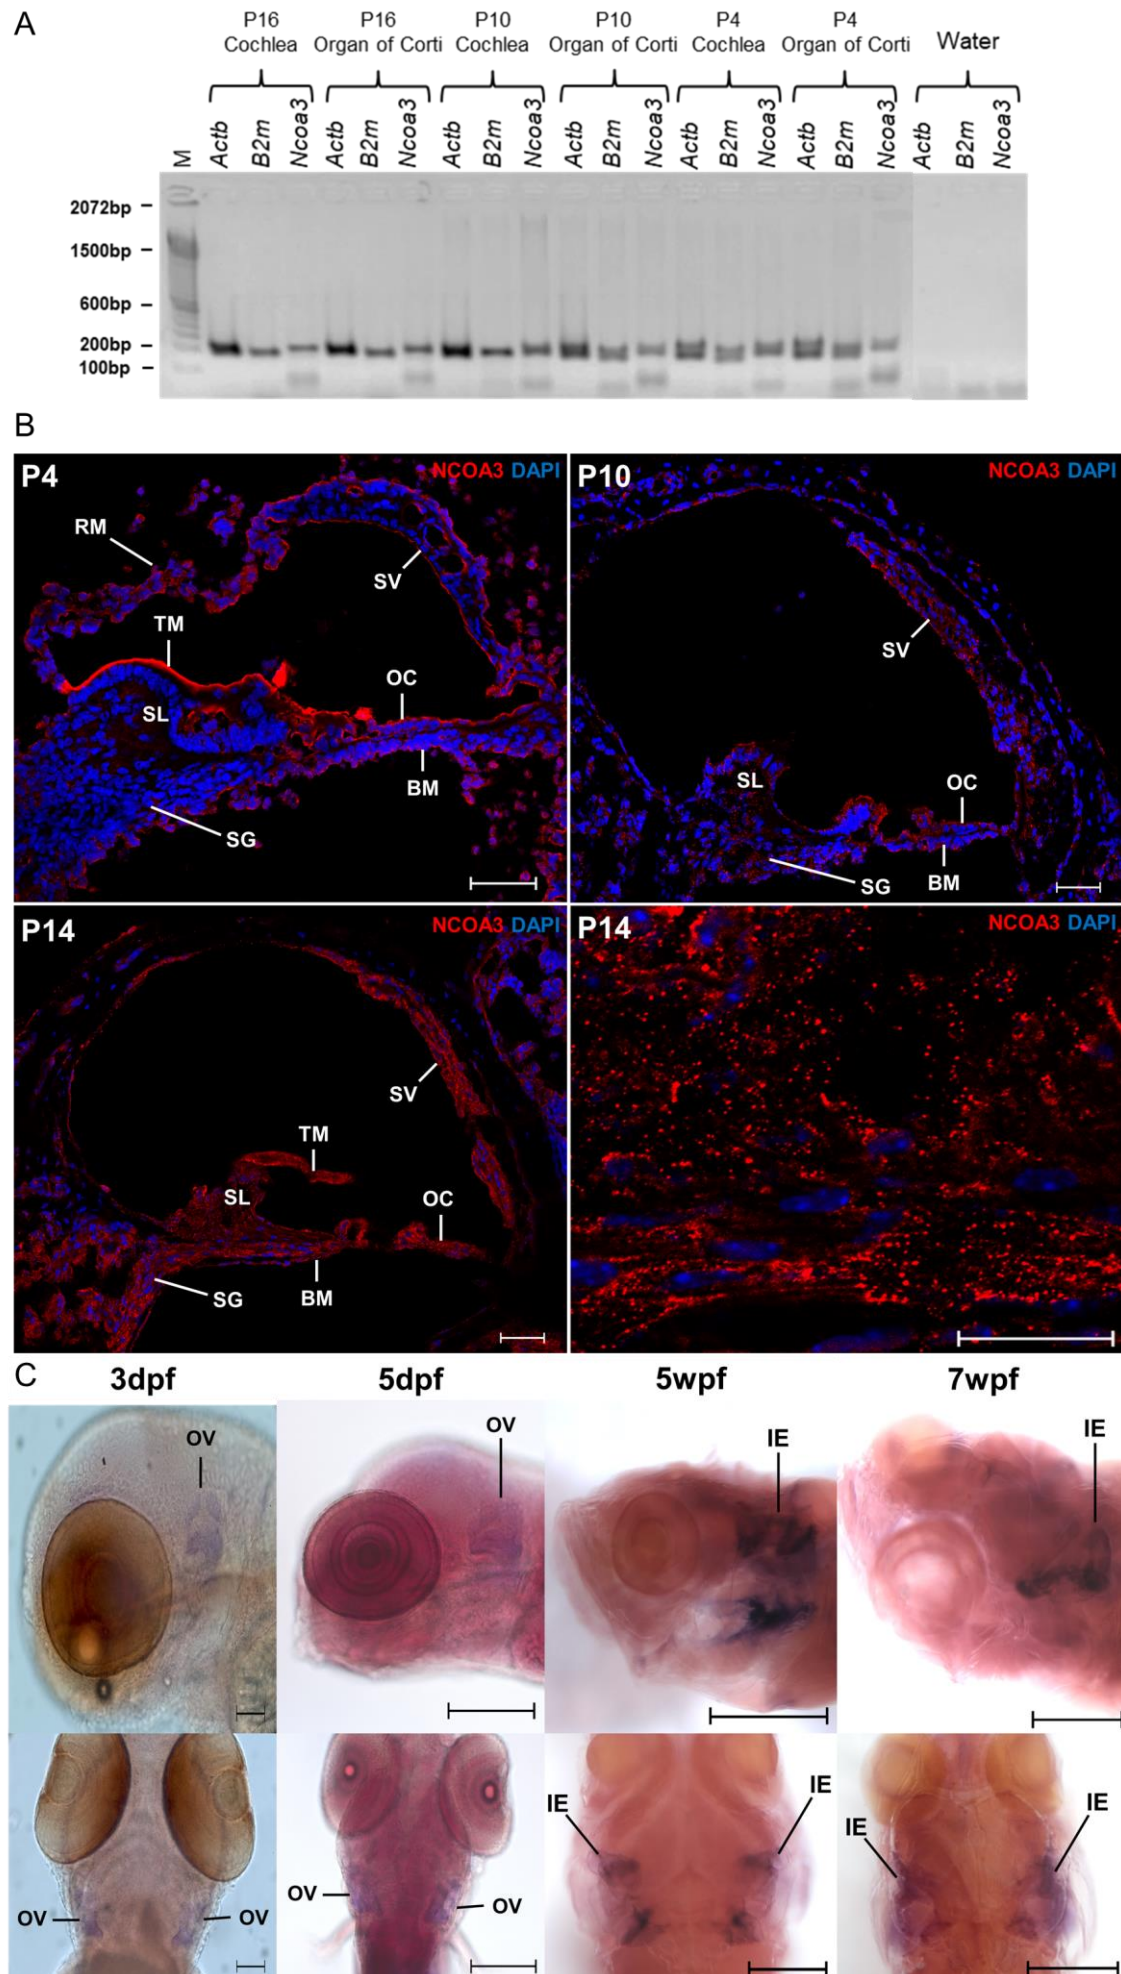

Figure 3

bioRxiv preprint doi: <https://doi.org/10.1101/2020.06.07.138909>; this version posted June 8, 2020. The copyright holder for this preprint (which was not certified by peer review) is the author/funder. All rights reserved. No reuse allowed without permission.

A

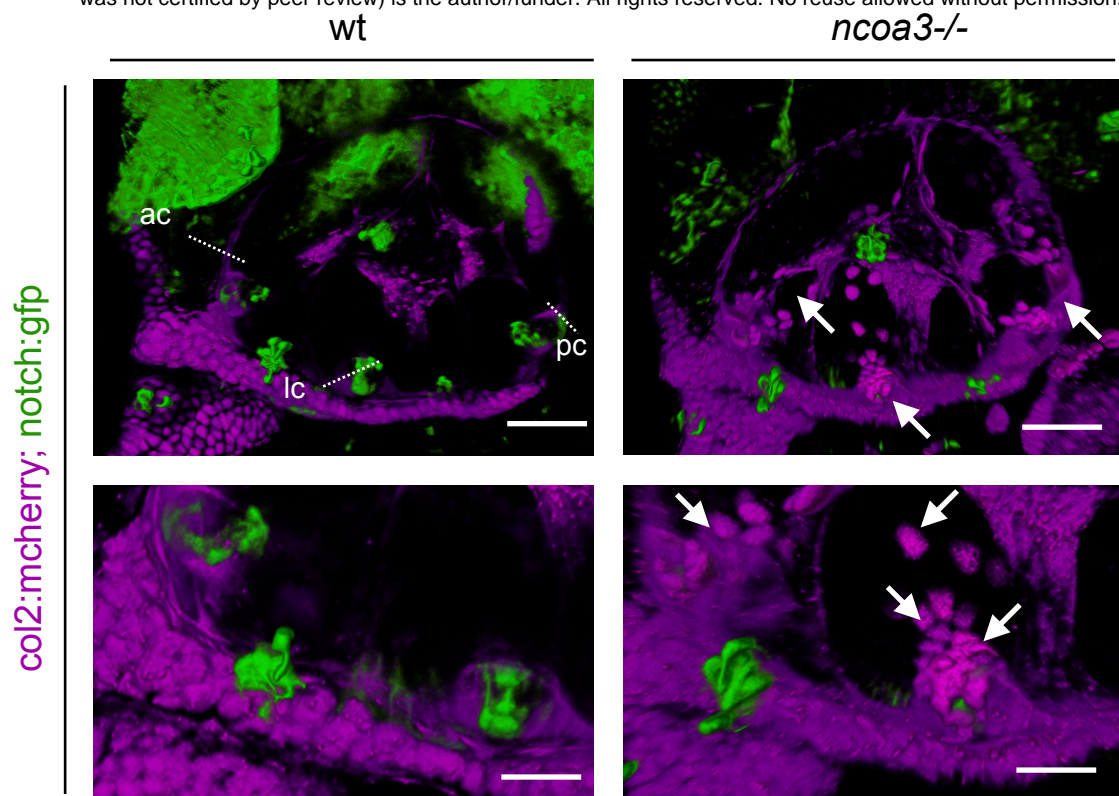

B

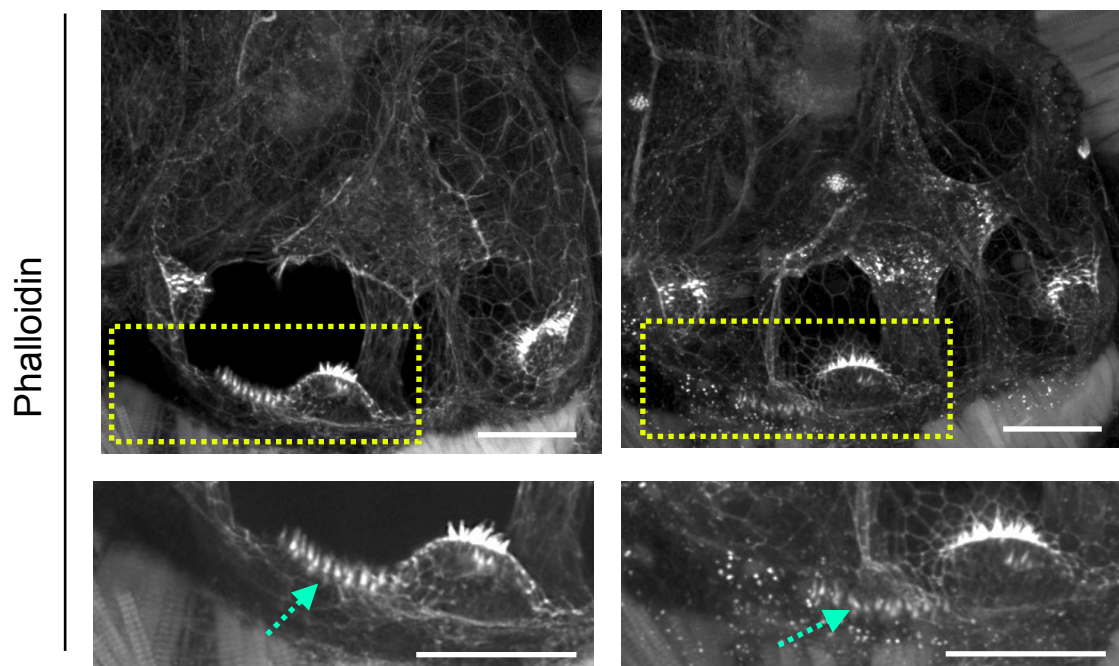

# Figure 4

bioRxiv preprint doi: <https://doi.org/10.1101/2020.06.07.138909>; this version posted June 8, 2020. The copyright holder for this preprint (which was not certified by peer review) is the author/funder. All rights reserved. No reuse allowed without permission.

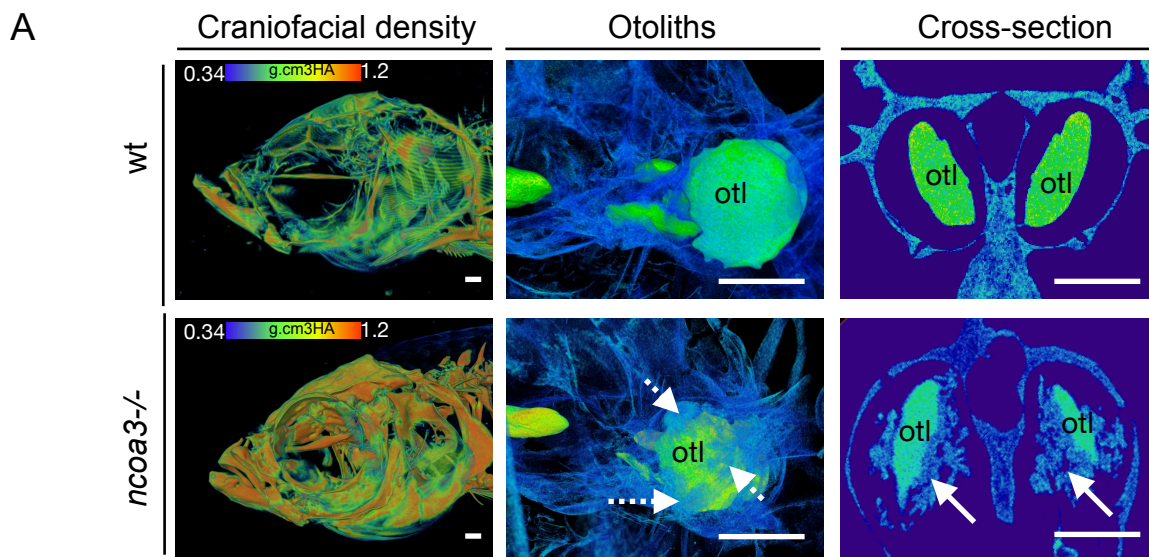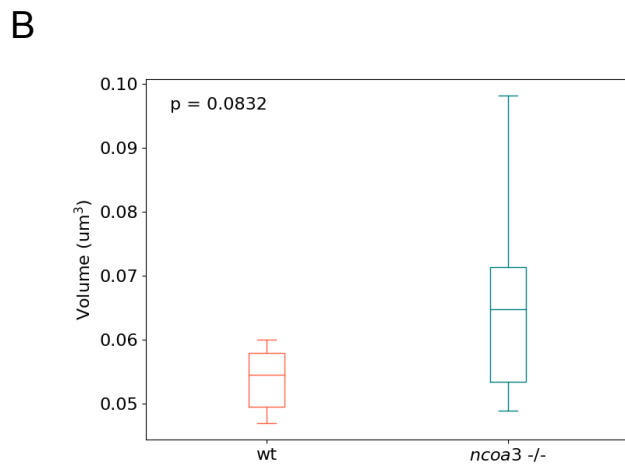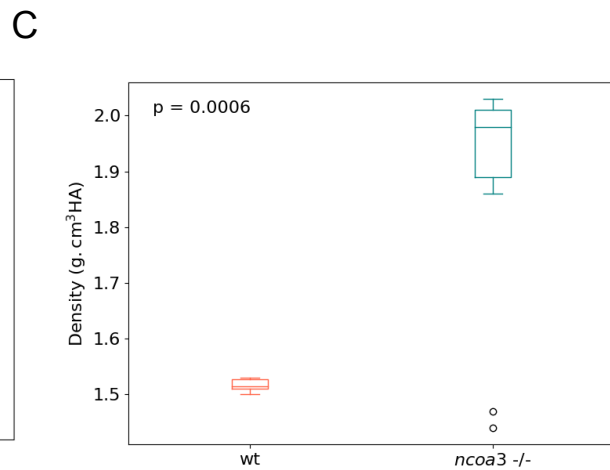



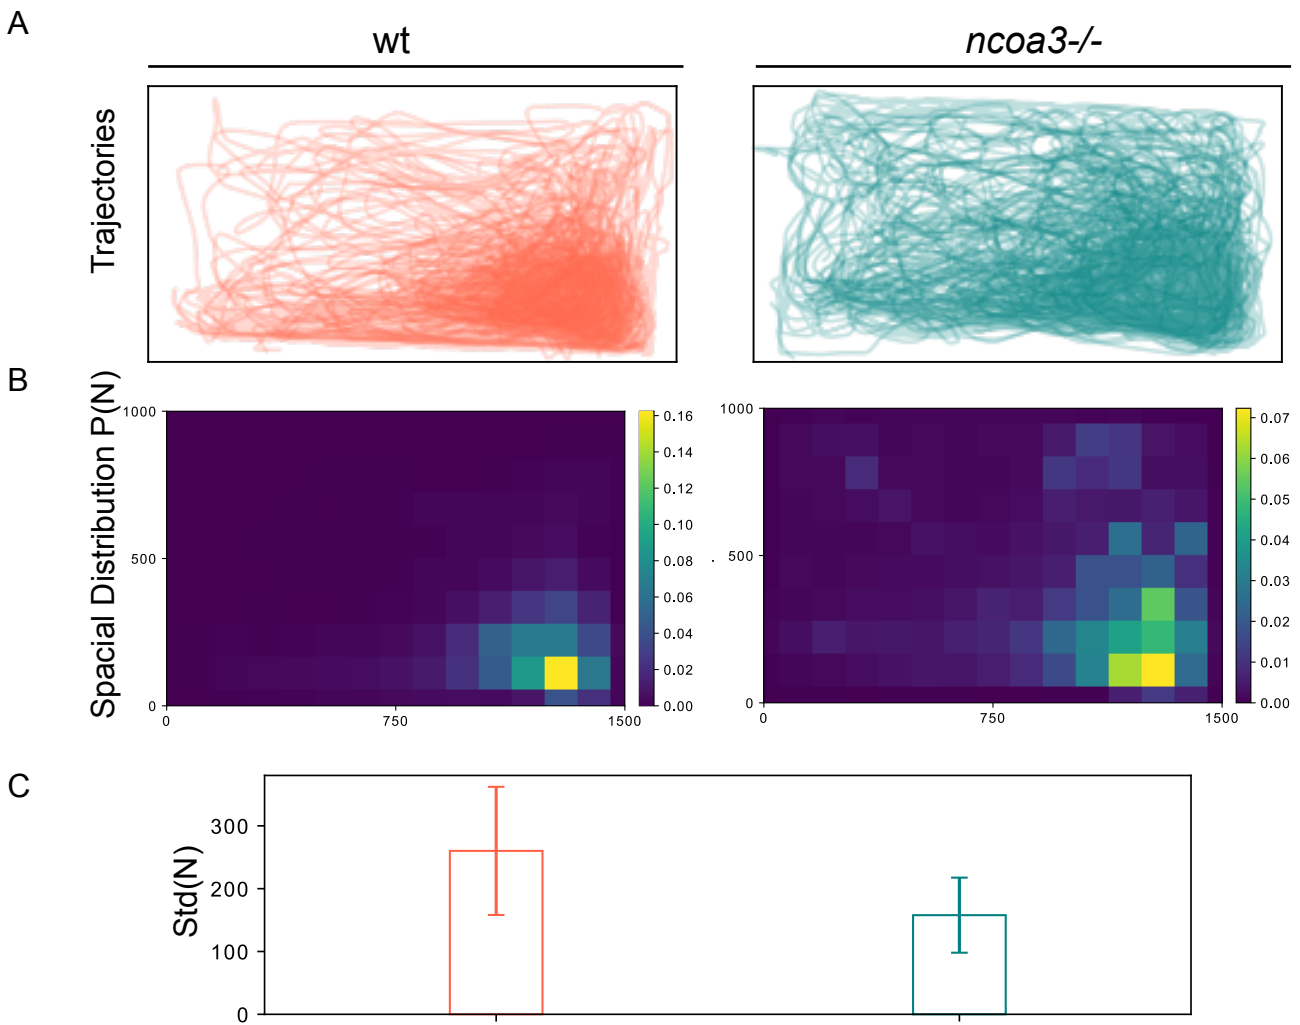

Source: https://www.biorxiv.org/content/biorxiv/early/2020/06/08/2020.06.07.138909.full.pdf
